# Supplementary material
Source: Springer Nature journal article supplement (https://www.springermedizin.de/resource/supplementary/12887_2012_796_MOESM2_ESM.pdf/9476244)

# LOS(days)

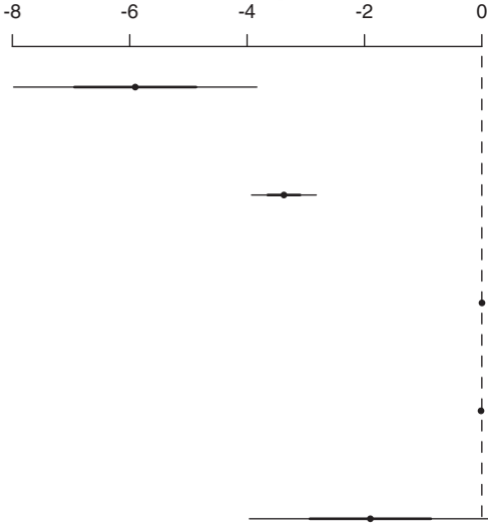

Supplement: MOESM2 [file 9476244]
